# Supplementary material
Source: PubMed Central journal article supplement (PMC5811376)
Supplement: NIHMS926477-supplement-1.pdf [file NIHMS926477-supplement-1.pdf]

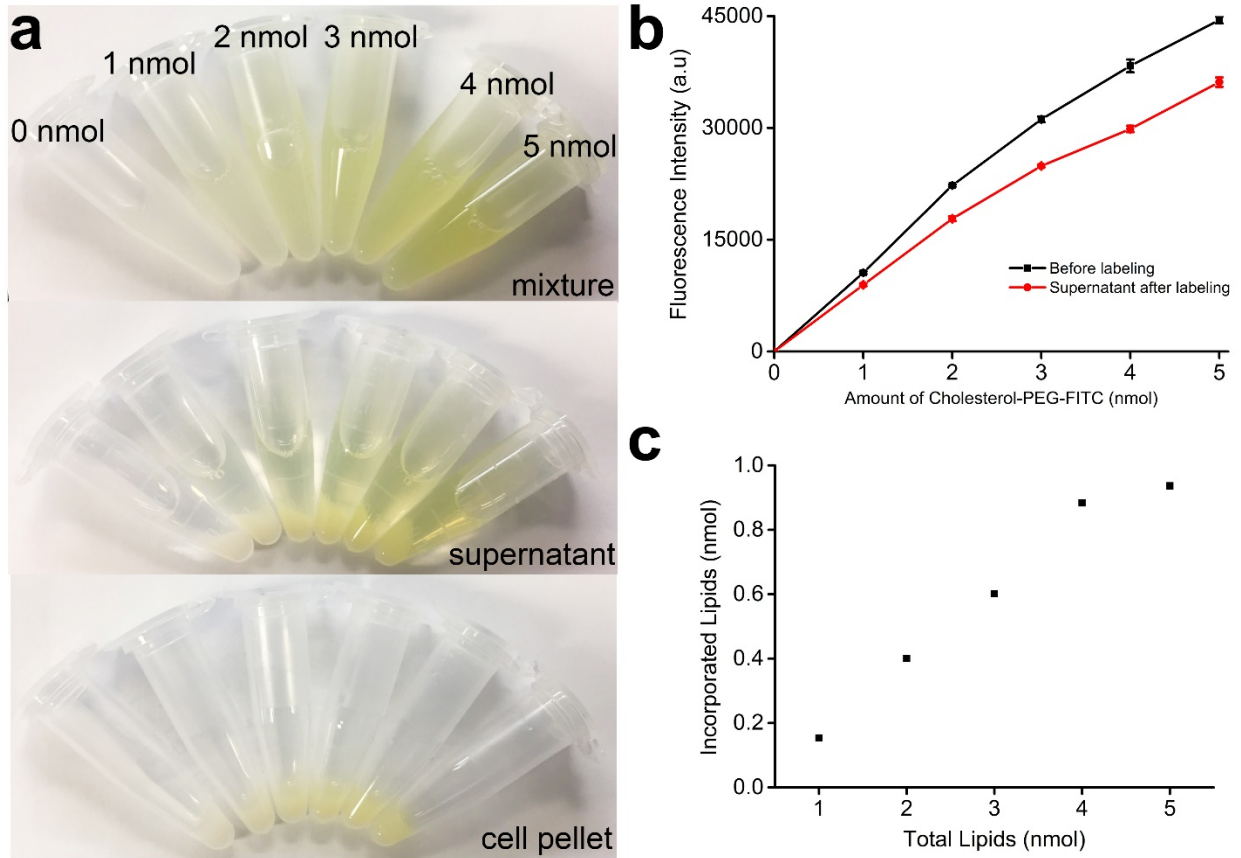

**Figure S1 | Optimization of PEGylated cholesterol amount for cell labeling.** **a**, various amount of FITC tagged PEGylated cholesterol ranging from 0 to 5 nmol was used to incubated with  $\sim 10^7$  cells, respectively. After labeling cells were pelleted, and the supernatant was removed for measurement of fluorescence intensity. **b**, fluorescence intensity of FITC tagged PEGylated cholesterol before and after cell labeling ( $n = 25$ ). **c**, amount of incorporated lipids onto cell membrane in respective group ( $n = 25$ ).

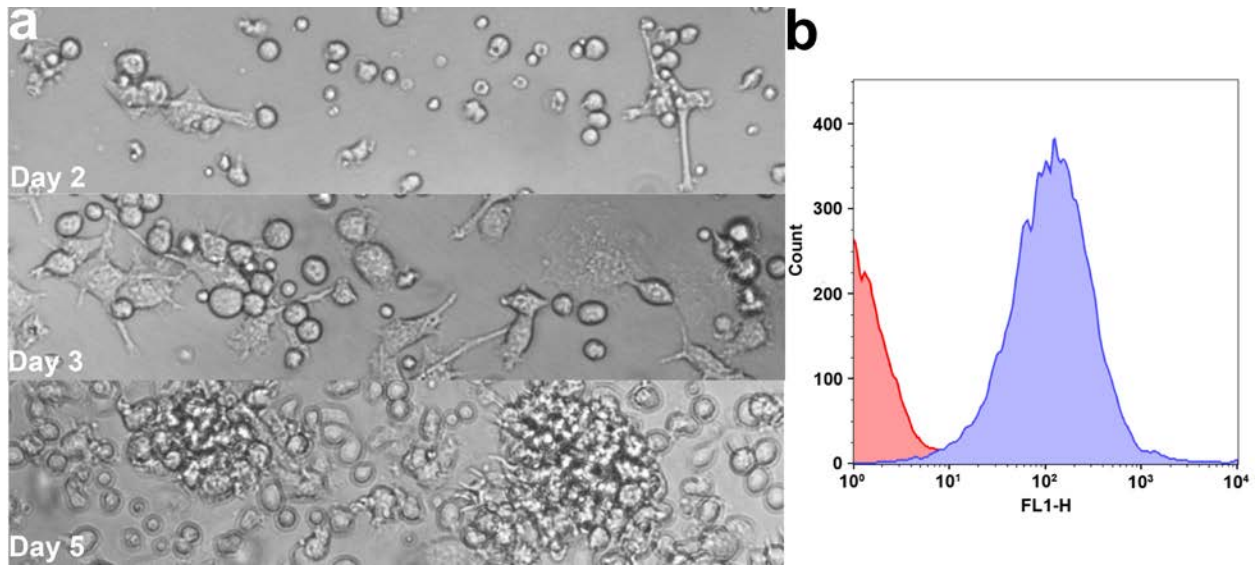

**Figure S2 | Morphology and characterization of isolated bone marrow dendritic cells. a**, morphology of bone marrow dendritic cells at day-2, -3, and -5, respectively. **b**, histogram plot for CD11c expression on purified dendritic cells at day-6. Isotype control was used as background control (red-filled area). The percentage of CD11c positive cell was approximately 90%.

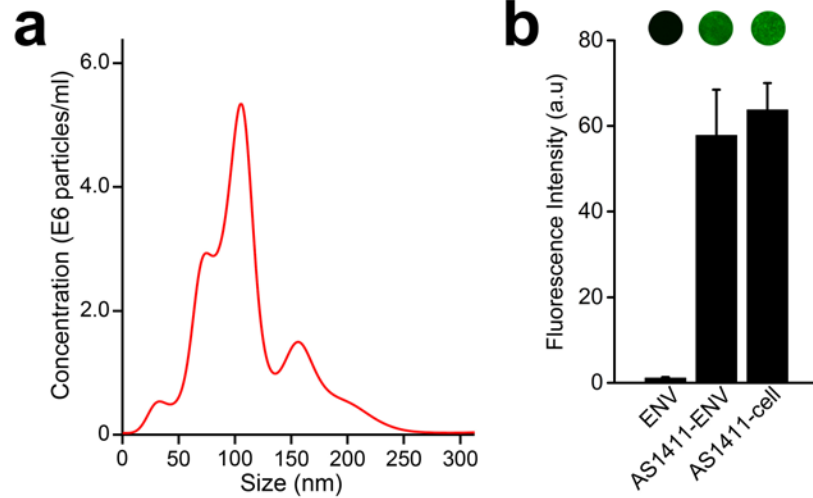

**Figure S3 | Characterization of AS1411-ENVs prepared by direct incubation of ENVs with AS1411-PEG<sub>2000</sub>-Chol.** **a**, size distribution of AS1411-ENVs prepared by direct incubation of ENVs with AS1411-PEG<sub>2000</sub>-Chol at 4 °C for 5 min. **b**, fluorescence intensity of dots of ENVs, AS1411-ENVs prepared by cell labeling and extrusion, and AS1411-ENVs prepared by direct incubation of ENVs with lipidated AS1411, respectively (n=25, *p*<0.05).



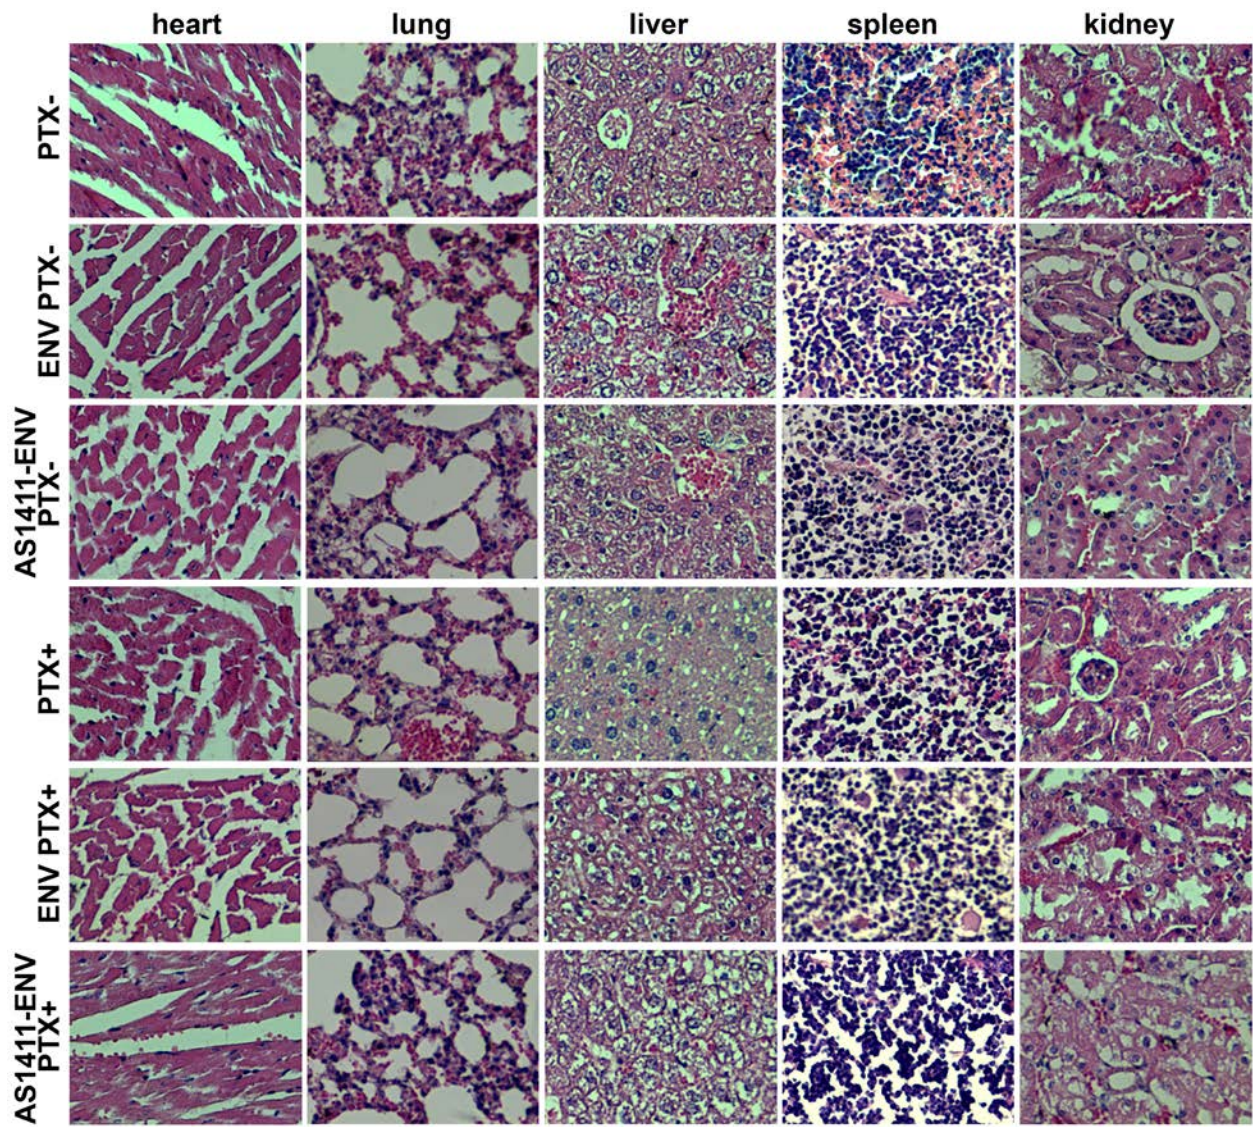

**Figure S4 | HE staining of major organs and tumor in three negative control groups.** After 20 days of treatment, mice were sacrificed. Major organs and tumors were processed for HE staining to detect organ specific toxicity induced by PTX.
